# Supplementary material
Source: publisher figshare collection journal article supplement (https://asha.figshare.com/articles/dataset/_/16734553)
Supplement: Supplementary file 2 [file 1]

### Supplemental Material S3. Community of practice components.

The screenshot shows a user profile for Charity Rowland. At the top, there are navigation tabs for 'COMMUNICATION MATRIX', 'Assessment', and 'Community'. Below the tabs is a search bar and a 'Translate this site into:' dropdown menu set to 'English'. The profile header includes the name 'Charity Rowland' and her affiliation 'Oregon Health & Science University'. A list of details follows: 'Portland, OR', 'Screen Name: Charity Rowland', and 'Language:'. A profile picture of a woman with glasses is shown to the right. Below the photo is a bio: 'I am a researcher whose primary interest and passion is in the development of communication skills in people who can't speak, for one reason or another. I developed the Communication Matrix to better describe what these children and adults CAN do (as opposed to what they can't do) to express themselves. I encourage professionals and family members to use this community to share their insights.' At the bottom of the profile, there is a 'View posts by Charity Rowland' link and a blue 'Follow' button.

#### Welcome to our Com

Our Community is a resource for communication disorder. Family researchers use the Forum to

Search the forum

Our guest hosts collect the best Community Forum!

#### Matrix filter

All Posts filtered by: Level 7

#### Aided Symbol Input :

Karen Natoci

11/25/2019

The Communication Matrix is an assessment communication partner is to use reas

#### Mason's Milestones

Kelly Fonner

7/12/2019

Lesley Skahan is Mom to 3 Boys, one parent, and a woman on a mission to

#### Fmmy is a Star!

Kelly Fonner

6/13/2019

The screenshot shows a 'CURRENT COLLECTION' titled 'Aided Language Techniques'. It includes a 'DATE CREATED:' field with the value '7/16/2018' and a 'POSTS:' field with the value '2'. There is a 'Suggest A Host' button and a 'Follow Collection' button. Below the buttons, it says 'COLLECTION HOST' followed by a link to 'Mason's Milestones' and a Twitter handle '@masonmilestones'. A note states: 'This collection is a collaboration between the following professionals working in Illinois public schools: Lynn Coates (SLP), Elizabeth Engemann (educator), Heather Pratt'. There are also social media icons for Facebook and Twitter.

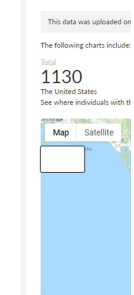

*Note.* Screenshots of the Communication Matrix Community of Practice the components include the member profile (upper left), Community Forum (upper right), Collections (bottom left), and Shared Science (bottom right).
