# Supplementary material
Source: publisher figshare collection journal article supplement (https://asha.figshare.com/articles/dataset/_/16734553)
Supplement: Supplementary file 4 [file 1]

## Supplemental Material S2. CMPDP activities.

The top left screenshot shows a Moodle dashboard for the 'Using the Communication Matrix' course. It includes a progress bar, navigation links, and an overview of learning objectives and participant goals.

The top right screenshot is a webinar titled 'Using the Communication Matrix'. It displays 'Abstract Symbols (Level 06)' with examples of printed words, brailled words, 3-dimensional symbols, and 2-dimensional symbols.

The bottom screenshot is the Communication Matrix assessment results grid. It is a 7x17 grid of colored boxes representing different communication skills. The grid is organized into four main categories: A1 (Language), A2 (Language), A3 (Language), and A4 (Language). The grid is color-coded: white for 'Not Used', yellow for 'Emerging', orange for 'Mastered', and grey for 'Surpassed'.

| Level   | A1       | A2       | A3       | A4       | A5       | A6       | A7       | A8       | A9       | A10      | A11      | A12      | A13      | A14      | A15      | A16      | A17      |
|---------|----------|----------|----------|----------|----------|----------|----------|----------|----------|----------|----------|----------|----------|----------|----------|----------|----------|
| Level 1 | Not Used |
| Level 2 | Not Used |
| Level 3 | Not Used |
| Level 4 | Not Used |
| Level 5 | Not Used |
| Level 6 | Not Used |
| Level 7 | Not Used |

*Note.* Screenshots of the moodle (upper left), webinar (upper right), and the Communication Matrix assessment results (bottom).
