# Supplementary material
Source: publisher figshare collection journal article supplement (https://asha.figshare.com/articles/dataset/_/16734553)
Supplement: Supplementary file 6 [file 1]

**Supplemental Material S1.** Detailed school characteristics.

| School      | Count | Grade | Title 1 Status | FRM <sup>a</sup> | IEPs | LI <sup>b</sup> | Hispanic /Latinx | White | Black/ African American | American Indian | Asian | Multiple races |
|-------------|-------|-------|----------------|------------------|------|-----------------|------------------|-------|-------------------------|-----------------|-------|----------------|
| Chicago 1   | 1     | PK    | 0              |                  | 25%  | 30%             | 32%              | 39%   | 1%                      | 5%              | 22%   | 1%             |
| Chicago 2   | 1     | PK-5  | 0              |                  | 21%  | 14%             | 8%               | 85%   | 2%                      | 0%              | 2%    | 2%             |
| Chicago 3   | 1     | PK-5  | 0              |                  | 23%  | 10%             | 7%               | 85%   | 1%                      | 1%              | 4%    | 3%             |
| Chicago 4   | 1     | PK-5  | 1              | 58%              |      |                 | 40%              | 47%   | 1%                      | 0%              | 0%    | 1%             |
| Chicago 5   | 2     | PK-6  | 1              |                  | 19%  | 15%             | 14%              | 74%   | 4%                      | 1%              | 4%    | 4%             |
| Chicago 6   | 1     | PK-6  | 1              |                  | 18%  | 30%             | 6%               | 81%   | 4%                      | 1%              | 3%    | 6%             |
| Chicago 7   | 1     | PK-8  | 0              |                  | 24%  | 0%              | 5%               | 85%   | 0%                      | 0%              | 2%    | 8%             |
| Chicago 8   | 1     | PK-8  | 1              |                  |      | 33%             | 20%              | 66%   | 2%                      | 0%              | 10%   | 2%             |
| Chicago 9   | 5     | PK-12 | 0              | 16%              |      |                 | 20%              | 60%   | 10%                     | 0%              | 0%    | 1%             |
| Chicago 10  | 24    | PK-12 | 0              | 9%               | 90%  |                 | 16%              | 56%   | 10%                     | 0%              | 16%   | 2%             |
| Chicago 11  | 1     | K-3   | 1              |                  | 18%  | 44%             | 45%              | 24%   | 6%                      | 0%              | 23%   | 2%             |
| Chicago 12  | 1     | K-5   | 1              |                  | 7%   | 45%             | 16%              | 40%   | 8%                      | 1%              | 33%   | 2%             |
| Chicago 13  | 2     | 1-6   | 0              | 30%              |      |                 | 20%              | 70%   | 0%                      | 0%              | 0%    | 0%             |
| Chicago 14  | 1     | 3-5   | 0              |                  | 9%   | 32%             | 12%              | 55%   | 3%                      | 0%              | 26%   | 4%             |
| Chicago 15  | 1     | 4-5   | 1              |                  | 7%   | 33%             | 18%              | 70%   | 2%                      | 0%              | 9%    | 1%             |
| Chicago 16  | 1     | 6-8   | 0              |                  | 11%  | 32%             | 16%              | 63%   | 5%                      | 0%              | 11%   | 4%             |
| Chicago 17  | 1     | 6-8   | 0              |                  | 9%   | 9%              | 5%               | 56%   | 1%                      | 0%              | 32%   | 5%             |
| Chicago 18  | 1     | 9-12  | 0              |                  | 12%  | 12%             | 14%              | 72%   | 2%                      | 0%              | 10%   | 3%             |
| St. Louis 1 | 14    | K-8   | 1              | 82%              |      |                 | 2%               | 30%   | 66%                     | 0%              | 0%    | 1%             |
| St. Louis 2 | 10    | K-8   | 1              | 53%              |      |                 | 3%               | 42%   | 31%                     | 1%              | 1%    | 20%            |
| St. Louis 3 | 13    | K-8   | 0              | 33%              |      |                 | 2%               | 85%   | 10%                     | 0%              | 5%    | 2%             |
| St. Louis 4 | 2     | 9-12  | 1              | 19%              |      |                 | 2%               | 87%   | 5%                      | 0%              | 4%    | 2%             |
| St. Louis 5 | 7     | 9-12  | 1              | 74%              |      |                 | 1%               | 24%   | 71%                     | 1%              | 1%    | 7%             |
| St. Louis 6 | 7     | 9-12  | 1              | 33%              |      |                 | 3%               | 59%   | 34%                     | 0%              | 0%    | 3%             |

*Note.* Chicago Suburbs Schools had both self-contained and inclusive classrooms. Two Chicago schools were not included, because they did not report school information. School names have been changed for privacy.

<sup>a</sup>Free or Reduced Meals. <sup>b</sup>Low Income.
