# Supplementary material
Source: publisher figshare collection journal article supplement (https://asha.figshare.com/articles/dataset/_/16734553)

**Supplemental Material S6.** IEP quality goal score trajectories.

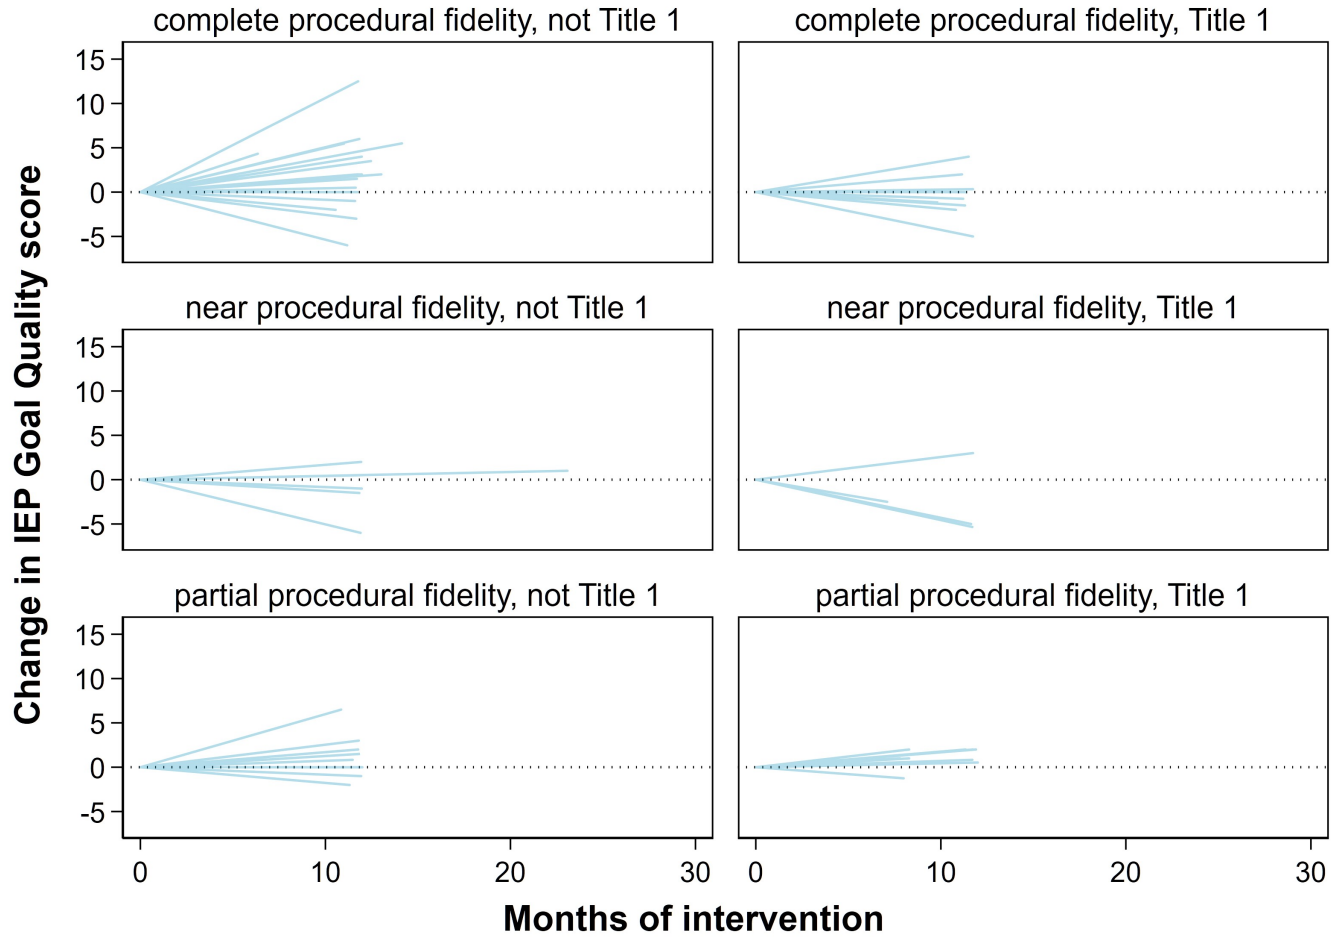

Supplement: Supplementary file 3 [file 1]

**Supplemental Material S5.** Communication Matrix total score trajectories.

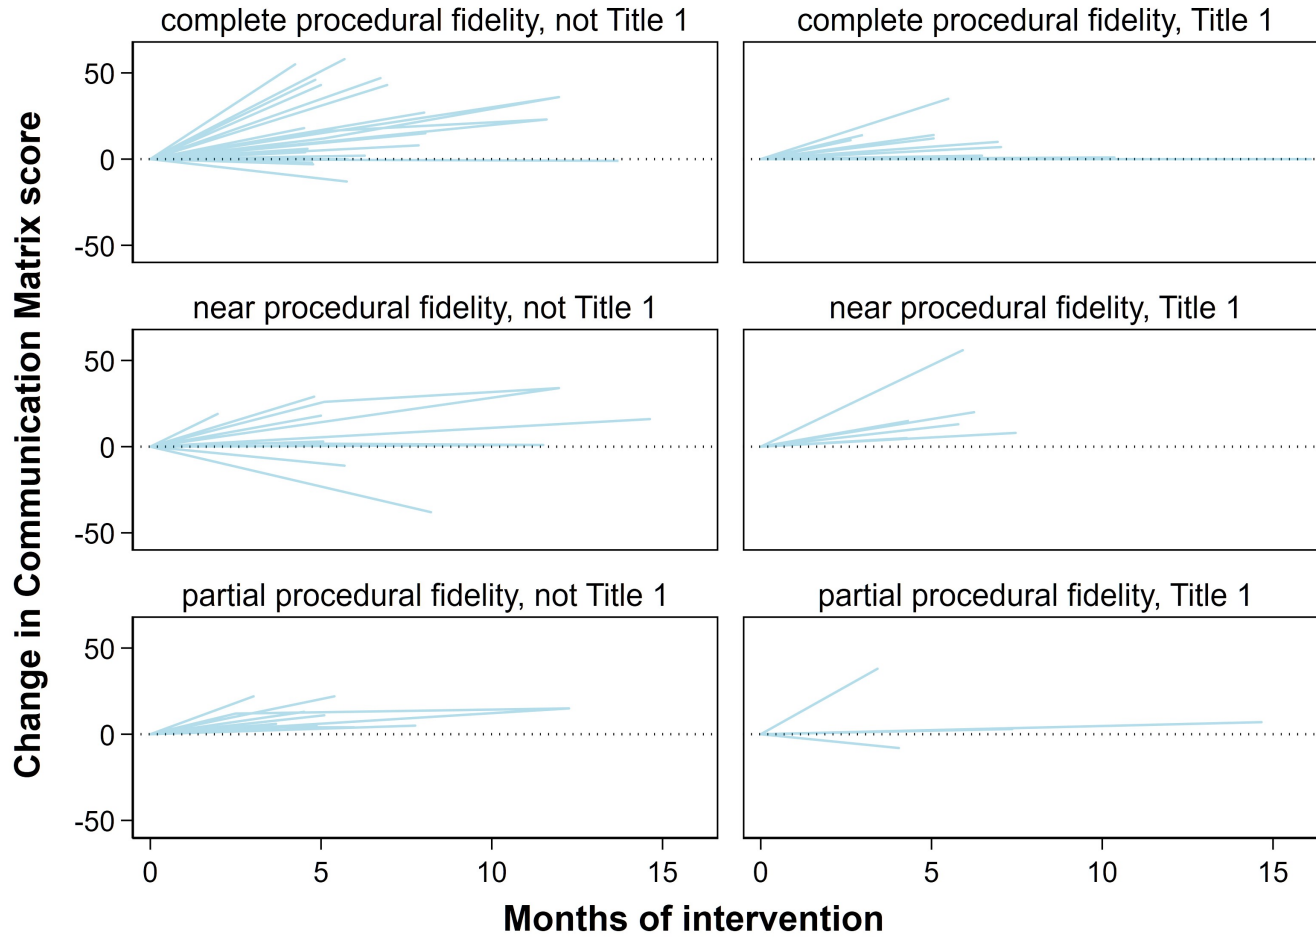

Supplement: Supplementary file 5 [file 1]
